# Supplementary material
Source: Springer Nature journal article supplement (https://www.springermedizin.de/resource/supplementary/13023_2013_558_MOESM5_ESM.pdf/9642778)

FLAG-THOC6

DAPI

MERGED

A

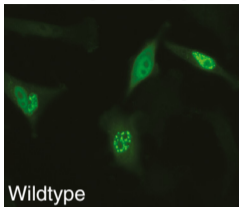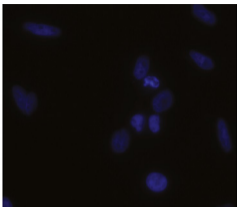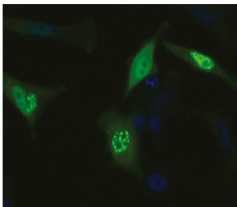

B

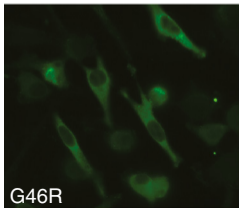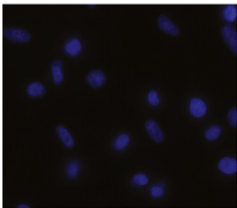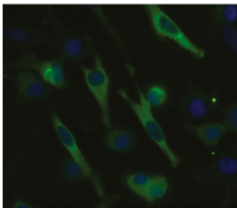

Supplement: MOESM5 [file 9642778]
